# Supplementary material
Source: publisher site journal article supplement (https://www.dovepress.com/article/391734)
Supplement: Supplementary file 1 [file get_supplementary_file.php]

**Supplementary 1:** Included Review Material

Legend

| EEN | Endorsed Enrolled Nurse |
| --- | --- |
| NP | Nurse Practitioner |
| RN | Registered Nurse |

Arranged in Publication type, then descending date order.

| **Publication Category** | **Review List Number** | **Published Year** | **Publication Type** | **Reference** | **Outline** | **Nurse Type Mentioned** | **Nursing Level Mentioned** | **Sub-specialty Context** | **Clinical Environment** |
| --- | --- | --- | --- | --- | --- | --- | --- | --- | --- |
| Journal / Academic Paper | 1 | 2020 | Original Research | Athikarisamy, S,E, Lam, G,C, Ross, S, Rao, S,C, Chiffings, D, Simmer, K, Bulsara, M,K., & Patole, S. (2020). Comparison of wide field imaging by nurses with indirect ophthalmoscopy by ophthalmologists for retinopathy of prematurity: a diagnostic accuracy study. BMJ Open. 5:10(8). | Through a retinopathy of prematurity screening program, this paper examined the utilisation (potential) of nurses to screen neonates inside the Neonatal Intensive Care Unit (using indirect ophthalmoscope), when provided with extended ophthalmic training. The paper indicated that nurses trained with these additional skills can be used to provide this service. | RN | Extended skills | Retinopathy of Prematurity | Neonatal Intensive Care |
| 2 | 2011 | Review | O’Sullivan F. (2011). Striving for Excellence - QEH's commitment to ophthalmic nurse education. *Int. J Ophthal. Practice*. 2;5.234-238 | Through the example of one organisation, this review discussed the success of developing a novice nurse ophthalmic training program. It emphasised how investing in eye care training programs within eye care facilities can attract and retain nurses into the profession long term. | RN/EEN | Novice /Training | Day Surgery | Day Surgery |
| 3 | 2006 | Original Research | Kirkwood, B,J, Coster, D,J., & Essex, R,W. (2006a). Ophthalmic nurse practitioner led diabetic retinopathy screening. Results of a 3-month trial. *Eye*. 20:(2);173-7 | Through the example of a diabetic screening clinic, this paper provided detail on the utilisation (potential) of nurses with extended nurse practitioner skill-sets to lead diabetic retinopathy screening programs. It examined workforce design and concluded that trained nurses can be used to lead these programs. | NP | Extended skills | Diabetic Retinopathy | Clinic |
| 4 | 2006 | Original Research | Kirkwood, BJ, Pesudovs, K, Latimer, P., & Coster D, J. (2006b). The efficacy of a nurse-led preoperative cataract assessment and postoperative care clinic. *Med J Aust*. 20;184(6):278-81 | Through the example of cataract surgery pre and post-operative clinics, this paper provided detail on the utilisation (potential) of nurse practitioners with extended skill-sets. It also considered the value of nurse use across public and private care models. It concluded that trained nurses with extended skills can support pre-and post-operative cataract clinics. | NP | Extended skills | Cataracts | Clinic |
| 5 | 2005 | Original Research | Kirkwood, B,J, Pesudovs, K, Loh, R,S., & Coster D, J. (2005). Implementation and evaluation of an ophthalmic nurse practitioner emergency eye clinic. *Clin. Experiment. Ophthalmol*. 33(6): 593-7 | This paper evaluated the use of nurse practitioners within emergency eye clinics. It compared nursing and non-nursing workforce providers. It concluded that trained nurses can provide effective care to patients in this environment. | NP | Extended skills | Emergency | Emergency |
| Journal Letter to the Editor | 6 | 2006 | Letter to the Editor | McKee, H,D,R., & Gole, G,A. (2006). Letter to the Editor: The efficacy of a nurse-led preoperative cataract assessment and postoperative care clinic. *MJA.* 85:1;3 | This Letter was published in response to the Kirkwood BJ, Pesudovs K, Latimer P., & Coster DJ paper (listed above as review list number 4). The author's believed that while the paper had merit it did not discuss the utility of other care providers alongside that of nurses and other resource barriers. | RN | Extended skills | Cataracts | Clinic |
| Industry Features Review | 7 | 2008 | Review | Machin. H. (2008). Ophthalmic nurses advance forward. *Mivision*. 26;48-49 | This review was a 12 month follow-up from the Machin 2007 review (listed below as review list number 8). In this review, the author discussed the barriers to the implementation of national ophthalmic competencies/standards. It quoted nurses from around the country, who supported the need for the development of such documents. | Not specified | Staff base level | Generalist | Generalist |
| 8 | 2007 | Review | Machin H. (2007). Ophthalmic nurses enter a new era. *Mivision*. 12; 26-28 | This review provided a generalist overview of the ophthalmic nursing situation in Australia, in terms of its professional recognition, national similarities and differences, ophthalmic nursing associations and available coursework at the time of publication. | Not specified | Staff base level | Generalist | Generalist |
| Industry Report / Standards | 9 | 2018 | Standards | Australian Ophthalmic Nurses Association National Council. (2018). Practice Standards for Ophthalmic Nurses in Australia. Sydney. | This document, published by the Australian Ophthalmic Nurses Association National Council is the first national nurse standards framework in eye care in Australia. It outlined the key expectations of nurses when provide care, working with other care providers, and supporting and promoting evidence-based best practice, and advancement in the field of eye care, at various professional levels. | EN, EEN, RN, PN | All | All | All |
| 10 | 2016 | Report | Australian Commonwealth Government. Australian Institute of Health and Welfare. Eye health workforce in Australia. 2016. | This is a key workforce document that directly addressed workforce development in eye care in Australia. It highlighted the lack of information available about nurses in eye care. It superseded the 2009 version (listed below as review list number 11). | N/A | N/A | N/A | N/A |
| 11 | 2009 | Report | Australian Commonwealth Government. (2009). Australian Institute of Health and Welfare. Eye health labour force in Australia. | This report replaced the 2016 edition (listed above as review list number 10). Nurse engagement and details about their workforce was missing from the report. | N/A | N/A | N/A | N/A |
